1 **Risky sexual behavior and its determinants among secondary school students in the highly**  
2 **HIV/AIDS burdened setting of South Ethiopia: Implications for decision makers**

3 Getamesay Aynalem Tesfaye\* (Email address: [getamesay91@gmail.com](mailto:getamesay91@gmail.com); Public Health  
4 Department, College of Medicine and Health Sciences, Jinka University, Jinka, Ethiopia).

5 Ermias Wabeto Wana (Email address: [ermiaswabeto@gmail.com](mailto:ermiaswabeto@gmail.com); Public Health Department,  
6 College of Medicine and Health Sciences, Jinka University, Jinka, Ethiopia).

7 Maranata Dawit Ambaw (Email address: [dawitmaranata@gmail.com](mailto:dawitmaranata@gmail.com); Public Health Department,  
8 College of Medicine and Health Sciences, Jinka University, Jinka, Ethiopia).

9 Bewuket Addis Alemayehu (Email address: [bewuketaddis2@gmail.com](mailto:bewuketaddis2@gmail.com); Nursing Department,  
10 College of Medicine and Health Sciences, Jinka University, Jinka, Ethiopia).

11 \*Correspondence: [getamesay91@gmail.com](mailto:getamesay91@gmail.com)

## 12 **Abstract**

13 **Background:** Risky sexual behavior (RSB) among youth can lead to serious social, economic,  
14 and health problems, such as unwanted pregnancy and acquired immune deficiency syndrome  
15 (AIDS). Despite a high burden of AIDS in the South Omo zone, little is known about RSB  
16 among secondary school students, and numerous studies in Ethiopia have discordant RSB  
17 findings. Therefore, this study aimed to assess the magnitude of risky sexual behavior and its  
18 determinants among secondary school students in the South Omo zone.

19 **Methods:** An institution-based cross-sectional study was conducted in January 2023. A  
20 multistage sampling method was used to select 538 students. A validated and structured self-  
21 administered questionnaire was used to collect data after pretesting. The results of descriptive  
22 analysis were presented by texts, tables and figures. Variables found to be  $p < 0.20$  in the bivariate  
23 logistic regression analysis were candidates for multivariate analysis. The level of statistical  
24 significance was declared at a p value less than 0.05 in multivariate analysis. Odds ratios along  
25 with their 95% confidence intervals (CIs) were used to present the results of the logistic  
26 regressions.

27 **Results:** The prevalence of RSB among the study participants was 25.9% (95% CI= 22.3%-  
28 29.9%). It was significantly associated with having sexually active close friends [adjusted odds  
29 ratio (AOR) = 3.09; 95% CI: 1.90-5.02], attending night clubs (AOR=2.56; 95% CI: 1.35-4.86),  
30 drinking alcohol (AOR=1.90; 95% CI: 1.10-3.29), parental neglect (AOR=2.10; 95% CI: 1.35-  
31 3.29) and HIV/AIDS-related knowledge (AOR=1.76; 95% CI: 1.12-2.77).

32 **Conclusions:** Risky sexual behavior among secondary school students was very high. Having  
33 sexually active friends, attending night clubs, drinking alcohol, parental neglect and HIV/AIDS-

34 related knowledge were determinants of RSB. Strengthening reproductive and sexual health  
35 services, close communication with youth in the family, measures to lessen alcohol consumption  
36 and night club attendance, and enhancing HIV/AIDS-related knowledge among secondary  
37 school students are needed.

38 **Key words:** Risky Sexual Behaviors, HIV/AIDS, High School Students, South Omo Zone,  
39 Ethiopia

#### 40 **Plain English summary**

41 Young people, who are aged 10 to 24 years, face various reproductive health problems as they  
42 transition from childhood to adulthood, including risky sexual behavior. Risky sexual behavior  
43 includes having more than one sexual partner, having first sex before 18 years, not usually using  
44 condoms during sexual intercourse, or having sex with commercial sex workers. It could lead to  
45 health problems such as unwanted pregnancy and sexually transmitted diseases.

46 This study was conducted to assess the amount of risky sexual behavior and related factors  
47 among secondary school students in the South Omo zone, South Ethiopia. By chance, we  
48 selected 538 students aged 15 to 24 years attending grades 9 to 12. Data were collected by using  
49 a questionnaire that selected students answered and returned. The data were processed and  
50 analyzed by a personal computer.

51 Among all selected students, 97% participated in the study. The current study showed that  
52 approximately one out of four students were practicing risky sexual behavior. The occurrence of  
53 risky sexual behavior was high among students with sexually active close friends, night club  
54 attendance, alcohol consumption habits, parental neglect and low HIV/AIDS-related knowledge.

55 In conclusion, the authors recommend decision makers intensify the availability and accessibility  
56 of reproductive and sexual health services for youths. Parents should be encouraged to openly  
57 and appropriately discuss reproductive and sexual health issues with their children. Additionally,  
58 it is crucial to decrease alcohol drinking habits and night club attendance of students, in addition  
59 to increasing HIV/AIDS-related knowledge.

## 60 **Background**

61 Young people are comprised of girls and boys whose ages range between 10 and 24 years,  
62 spanning the periods of adolescence and youth, which is also the age of most secondary school  
63 students. As young people transition from childhood to adulthood, they undergo rapid physical  
64 and psychosocial changes, and they gain new experiences, acquire new capacities and face many  
65 new situations and challenges (1). During this transition, they must be prepared with the  
66 knowledge and skills they need to make use of the opportunities and to face the challenges they  
67 will encounter in the adult world (2).

68 Mostly risky sexual behavior (RSB) is defined based on the behavior itself, which encompasses  
69 early sexual activity and unprotected sexual activity, the number and types of sexual partners,  
70 relationship to partner, frequency of sexual intercourse, and condom use (3, 4). The other but  
71 neglected way of RSB definition refers to the nature of the partner that includes if a partner is  
72 human immunodeficiency virus (HIV) positive, whether a partner is an intravenous drug user, or  
73 if a partner is nonexclusive. RSB among youth can lead to serious social, economic, and health  
74 problems such as sexual violence, unwanted pregnancy, ectopic pregnancy, cervical cancer,  
75 infertility and sexually transmitted diseases, including HIV infection (5-7).

76 Despite the effort of the World Health Organization to end the AIDS (Acquired  
77 Immunodeficiency Disease) epidemic as a public health threat by 2030, new HIV infections and  
78 AIDS-related deaths remain unacceptably high (8, 9). In 2020, youths contributed 44% of new  
79 HIV infections in sub-Saharan Africa despite comprising only 20% of the population (9). In  
80 Ethiopia, 0.2% of youths aged 15-24 are HIV-positive (10).

81 Ethiopia has developed strategies to meet the sexual and reproductive health demands of young  
82 people in the country and to end AIDS as a public health threat in 2030 (10, 11). However, the  
83 country has many RSB challenges among young people who have yet to be addressed. For  
84 instance, in 2016, 12.56% and almost 5% of youth people ever chewed khat and drank alcohol  
85 every day, respectively, and one in four women and 2% of men had first sexual intercourse  
86 before their fifteenth birthday (12). Additionally, numerous other studies in Ethiopia have  
87 underscored the RSB problem among young people (13-15).

88 Despite a high burden of HIV infections, little is known about the magnitude of RSB among  
89 secondary school students in the South Omo zone, South Ethiopia. Furthermore, numerous  
90 studies in Ethiopia on RSB had discordant findings (16-18). Therefore, this study was designed  
91 to determine the prevalence of RSB and its determinants among secondary school students in the  
92 South Omo zone. Therefore, the study will have implications for RSB and its determinants for  
93 decision makers to plan and manage RSB problems, especially HIV infections, among youths in  
94 the study area.

95 **Methods**

96 **Study design and period**

97 An institution-based cross-sectional study was conducted from January 1 to January 31, 2023.

98 **Study setting**

99 The study was conducted in the South Omo zone, which is located 767 kilometers southwest of  
100 Addis Ababa, the capital city of Ethiopia. The South Omo zone forms part of the Ethiopian  
101 region of SNNPR and is based in Jinka as its administrative town (19). It is one of Ethiopia's  
102 socially most diverse zones, containing a minimum of 12 different ethnic groups and possibly as  
103 many as 21. There are 820,480 people in nine districts of the South Omo zone who live as  
104 pastoralists and/or agrarians. In the South Omo zone, there are 21,848 students in 35 secondary  
105 schools comprising 11,651 male students and 10,197 female students.

106 **Source and study population**

107 The source population for this study was all secondary school students in the South Omo zone,  
108 whereas the study population was all selected secondary school students in the South Omo zone.  
109 The study unit was a randomly selected student from the selected secondary school students in  
110 the South Omo zone.

111 **Eligibility criteria**

112 All regular students aged 15 to 24 years who were registered in a selected secondary school were  
113 included in the study. All secondary school students who were unable to respond due to sickness

114 or those students who were not attending regular classes were excluded from the study due to  
115 data collection difficulties.

### 116 **Sample size determination**

117 The sample size for this study was determined using a single population proportion formula.  
118 Considering the following assumptions: 95% confidence level, 5% marginal error and 30.5%  
119 prevalence of RSB from a study in Mizan Aman (13), the formula yields a sample size of 326.  
120 After adding 10% for the nonresponse rate and with a design effect of 1.5, the required final  
121 sample size became 538.

### 122 **Sampling procedure**

123 A multistage sampling method was employed to select study participants. Hence, initially, three  
124 districts were selected randomly from all districts in the South Omo zone. Then, the calculated  
125 sample size was allocated proportionally to the three districts based on their number of secondary  
126 school students. Using the school register list as a sampling frame, a systematic random sampling  
127 technique was applied to select students from secondary school in each district.

### 128 **Study variables**

129 Risky sexual behavior is the outcome variable of the study. On the other hand, the independent  
130 variables are sociodemographic variables such as sex, age, grade level, religiosity, residence,  
131 living out of family, educational level of parents, occupation of parents, pocket money, and  
132 discussion on sexual and reproductive issues. HIV/AIDS knowledge, parental neglect, social  
133 support, and personal behaviors such as drinking alcohol, chewing khat, watching pornography,  
134 and attending night clubs are also independent variables of the study.

## 135 **Operational definitions and variable measurements**

136 Risky sexual behavior was defined as a student practicing at least one of the following behaviors:  
137 multiple sexual partners (having more than one sexual partner until the survey), early initiation  
138 of sex (first sex at <18 years), inconsistent use of condom (inconsistent/fail to use condom at  
139 least once during sexual intercourse until the survey), and sex with commercial sex workers at  
140 least once until the survey) (20). Adapted from the Anne Murphy study, parental neglect was  
141 measured by an adverse childhood experience questionnaire asking about childhood abuse  
142 (emotional, physical and sexual), childhood neglect (emotional and physical) and household  
143 dysfunction (mother treated violently, parental separation or divorce, mental illness in household,  
144 household substance abuse, incarcerated household member) (21). Consequently, students with  
145 adverse childhood experience scores above the mean were proclaimed to be victims of parental  
146 neglect. Social support was assessed by the Oslo Social Support Scale, which has three items.  
147 The sum of the scores will be categorized into three social support levels: poor (3-8), moderate  
148 (9–11), and strong (12–14)(22). Respondents were declared to have good knowledge about  
149 HIV/AIDS when they answered HIV/AIDS-related questions correctly more than the mean value  
150 (18).

## 151 **Data collection**

152 A validated structured self-administered questionnaire adapted from the Youth Risk Behavior  
153 Survey questionnaire was used to collect data (23). The questionnaire comprised questions about  
154 sociodemographic factors, personal behaviors, parental neglect, social support, and so on. It was  
155 prepared in the English language and translated into the Amharic language and then back to  
156 English by fluent speakers to check meaning consistency.



## 157 **Data quality control**

158 All research assistants were given two days of intensive training on the purpose of the study,  
159 ethical issues and how to facilitate the data collection. The questionnaire was pretested, two  
160 weeks prior to the actual data collection period, on regular government secondary school  
161 students with a size of 5% of the final sample size in nonselected districts. After pretesting the  
162 questionnaire, the reliability of the tool was assessed, and necessary modifications were made.  
163 The research investigators and the supervisors checked the completeness of each questionnaire.  
164 Two data clerks entered the data, and the consistency was cross checked. Multivariable logistic  
165 regression analysis was run to control confounding factors.

## 166 **Data processing and analysis**

167 After coding and cleaning, the data were entered into and analyzed by SPSS v26. Descriptive  
168 statistical analysis was used to describe the sociodemographic and sexual characteristics of the  
169 participants. Then, the information was presented using summary measures, tables, figures and  
170 texts. Both bivariate and multivariate logistic regression analyses were employed to determine  
171 the association between the output variable and independent variables. The multicollinearity  
172 effect of independent variables was checked, and variables with variance inflation factors (VIFs)  
173 greater than 5 were dropped from bivariate analysis. All covariates that were significant at p  
174 value  $< 0.20$  in bivariate analysis were considered for further multivariate analysis. The level of  
175 statistical significance was declared at a p value less than 0.05 in multivariate analysis, and the  
176 fitness of the multivariable logistic regression model was assured by the Hosmer- Lemeshow  
177 goodness of fit test and classification table. Crude and adjusted odds ratios along with their 95%  
178 confidence intervals were used to present the results of logistic regression.

179 **Results**

180 **Sociodemographic characteristics**

181 Among 538 selected students, 522 participated in the study, yielding a response rate of 97%. The  
182 median age of the students was 17.44 years, with a range of 9 years. Approximately 58.4% and  
183 81% of students' mothers and fathers were able to read and write, respectively. The monthly  
184 family income was less than 5,000 Ethiopian Birr for most (58%) students. Almost half (48.5%)  
185 of the participants discussed sexual and reproductive health issues with their parents, while one-  
186 third (32.2%) of them felt peer pressure about sexual and reproductive health issues (Table 1).

187 **Table 1:** Sociodemographic characteristics of secondary school students in the South Omo zone,  
188 Southwest Ethiopia, 2023 (N= 522).

| Variables               | Category        | Frequency     |                |
|-------------------------|-----------------|---------------|----------------|
|                         |                 | Number<br>(n) | Percent<br>(%) |
| Age group               | 15–19 years old | 471           | 90.2           |
|                         | 20–24 years old | 51            | 9.8            |
| Sex                     | Male            | 274           | 52.5           |
|                         | Female          | 248           | 47.5           |
| Grade                   | 9th grade       | 138           | 26.4           |
|                         | 10th grade      | 118           | 22.6           |
|                         | 11th grade      | 135           | 25.9           |
|                         | 12th grade      | 131           | 25.1           |
| Place of primary school | Urban           | 306           | 58.6           |

|                                       |           |     |      |
|---------------------------------------|-----------|-----|------|
|                                       | Rural     | 216 | 41.4 |
| <b>Living with parents</b>            | Yes       | 415 | 79.5 |
|                                       | No        | 107 | 20.5 |
| <b>Parental monitoring</b>            | Yes       | 385 | 73.8 |
|                                       | No        | 137 | 26.2 |
| <b>Pocket money</b>                   | Yes       | 296 | 56.7 |
|                                       | No        | 226 | 43.3 |
| <b>Visit of religious institution</b> | Never     | 29  | 5.6  |
|                                       | Sometimes | 168 | 32.2 |
|                                       | Often     | 325 | 62.3 |
| <b>Close friend experienced sex</b>   | Yes       | 110 | 21.1 |
|                                       | No        | 412 | 78.9 |
| <b>Social support</b>                 | Poor      | 229 | 43.9 |
|                                       | Moderate  | 200 | 38.3 |
|                                       | Strong    | 93  | 17.8 |

## 189 **Sexual behavior and drug use**

190 The prevalence of risky sexual behavior among secondary school students in the South Omo  
 191 zone is 25.9% (95% CI: 22.3-29.9). One-fourth (23.2%) of respondents had ever had sexual  
 192 intercourse, while the mean age of sexual debut was 15.84 years, with a standard deviation of 2.1  
 193 years. Of all respondents who ever had sexual intercourse, 57% and 87.6% of them had sexual  
 194 intercourse in the past 1 year and did not always use condoms, respectively. The main reasons  
 195 for not using condoms were trusting sexual partners (54.7%), unavailability of condoms (13.2%),

196 decrease in sexual pleasure (20.8%), refusal by sexual partners (7.2%) and others (4.3%) (Figure  
197 1) (Table 2).

198 **Table 2:** Sexual behavior and drug use of respondents (N= 522).

| Variables                                          | Category  | Frequency     |                |
|----------------------------------------------------|-----------|---------------|----------------|
|                                                    |           | Number<br>(n) | Percent<br>(%) |
| <b>Ever had sex</b>                                | Yes       | 121           | 23.2           |
|                                                    | No        | 401           | 76.8           |
| <b>Multiple sexual partner</b>                     | Yes       | 23            | 4.4            |
|                                                    | No        | 499           | 95.6           |
| <b>Ever had sex with<br/>commercial sex worker</b> | Yes       | 36            | 6.9            |
|                                                    | No        | 486           | 93.1           |
| <b>Ever watched pornographic<br/>film</b>          | Yes       | 120           | 23.0           |
|                                                    | No        | 402           | 77.0           |
| <b>Attend night clubs</b>                          | Yes       | 59            | 11.3           |
|                                                    | No        | 463           | 88.7           |
| <b>Alcohol drinking frequency</b>                  | Never     | 427           | 81.8           |
|                                                    | Sometimes | 95            | 18.2           |
| <b>Khat chewing frequency</b>                      | Never     | 488           | 93.5           |
|                                                    | Sometimes | 26            | 5.0            |
|                                                    | Often     | 8             | 1.5            |
| <b>Cigarette smoking frequency</b>                 | Never     | 492           | 94.3           |
|                                                    | Sometimes | 25            | 4.8            |

|                                  |           |     |      |
|----------------------------------|-----------|-----|------|
|                                  | Often     | 5   | 1.0  |
| <b>Use of illicit drugs like</b> | Never     | 497 | 95.2 |
| <b>hashish or cocaine</b>        | Sometimes | 16  | 3.1  |
|                                  | Often     | 9   | 1.7  |

199  
 200 **Figure 1:** Reasons to start sexual intercourse among secondary school students in the South Omo  
 201 zone (N= 121).

### 202 **Determinants of risky sexual behavior**

203 During multivariate logistic regression, close friends' sexual experience, night club attendance,  
 204 alcohol drinking habits, parental neglect, and HIV/AIDS knowledge were identified as  
 205 determinants of risky sexual behavior (Table 3).

206 Respondents whose close friend experienced sex were threefold-fold (adjusted odds ratio [AOR]  
 207 = 3.09; 95% CI (confidence interval): 1.90-5.02) more likely to have risky sexual behavior than  
 208 respondents whose close friend did not experience sex. In contrast to students who do not attend  
 209 night clubs, those students who attend night clubs are 2.56 times (AOR=2.56; 95% CI: 1.35-  
 210 4.86) more prone to risky sexual behavior. A respondent who sometimes drinks alcohol 1.90  
 211 times (AOR=1.90; 95% CI: 1.10-3.29) tends to have risky sexual behavior more than a  
 212 respondent who never drinks alcohol. The odds of having risky sexual behavior among students  
 213 with parental neglect is twice (AOR=2.10; 95% CI: 1.35-3.29) higher than that among students  
 214 with no parental neglect. Participants with poor HIV/AIDS knowledge were 1.76 times  
 215 (AOR=1.76; 95% CI: 1.12-2.77) more likely to have risky sexual behavior than participants with  
 216 good HIV/AIDS knowledge.

217 **Table 3:** Determinants of risky sexual behavior among secondary school students in the South  
 218 Omo zone, 2023 (N= 522).

| Variables                             | Risky sexual behavior |           | COR               | AOR                |
|---------------------------------------|-----------------------|-----------|-------------------|--------------------|
|                                       | No (387)              | Yes (135) | (95% CI)          | (95% CI)           |
| <b>Close friend experienced sex</b>   |                       |           |                   |                    |
| No                                    | 331                   | 81        | 1                 | 1                  |
| Yes                                   | 56                    | 54        | 3.94(2.52-6.15)** | 3.09 (1.90-5.02)** |
| <b>Ever watched pornographic film</b> |                       |           |                   |                    |
| No                                    | 318                   | 84        | 1                 | 1                  |
| Yes                                   | 69                    | 51        | 2.80(1.81-4.32)** | 1.55(0.93-2.58)    |
| <b>Attend night clubs</b>             |                       |           |                   |                    |
| No                                    | 361                   | 102       | 1                 | 1                  |
| Yes                                   | 26                    | 33        | 4.49(2.57-7.86)** | 2.56(1.35-4.86)*   |
| <b>Alcohol drinking frequency</b>     |                       |           |                   |                    |
| Never                                 | 338                   | 89        | 1                 | 1                  |
| Sometimes                             | 49                    | 46        | 3.57(2.24-5.68)** | 1.90(1.10-3.29)*   |
| <b>Parental neglect</b>               |                       |           |                   |                    |
| Yes                                   | 237                   | 48        | 2.86(1.91-4.30)** | 2.10(1.35-3.29)**  |
| No                                    | 150                   | 87        | 1                 | 1                  |
| <b>HIV/AIDS Knowledge</b>             |                       |           |                   |                    |
| Good                                  | 190                   | 44        | 1                 | 1                  |
| Poor                                  | 197                   | 91        | 2.00(1.32-3.01)   | 1.76(1.12-2.77)*   |

219 \*= P value < 0.05; \*\*= P value < 0.01

## 220 **Discussion**

221 Given the high burden of HIV/AIDS infection in the South Omo zone and limited scientific  
222 information on the prevalence of RSB and its determinants among secondary school students in  
223 the study area, this study was deemed necessary.

224 This study showed that one-fourth (25.9%) of secondary school students in the South Omo zone  
225 had experienced risky sexual behavior. The findings of this study are higher than those of a study  
226 conducted in Aksum town (17.2%) (24) and in Jiga town (14.7%) (25). The observed variation  
227 may be explained by the difference in methodologies and socioeconomic status. Moreover, a  
228 possible explanation for the discrepancy may be the difference in the time of study. Hence,  
229 students in the current study are more likely to watch pornographic movies and attend night  
230 clubs due to globalization and technological advances.

231 On the other hand, the magnitude of RSB in our study is less than the findings from studies in  
232 Addis Ababa (26.7%) (26), Kigali (41%) (27) and Bangkok (69.5%) (28). The possible reason  
233 for the difference may be the difference in the study setting in that the current study involved a  
234 more rural setting where there is limited technology to access events such as pornography.

235 Students whose close friends experienced sexual intercourse had increased odds of engaging in  
236 risky sexual behavior than their counterparts in this study setting. This is in line with past studies  
237 conducted in Wolaita Sodo town (29) and Enemay district (18). This could be due to peer  
238 pressure that could affect the behaviors of youths in a negative way, as shown by the study in  
239 Kigali (27).

240 The current study also revealed that in contrast to students who do not attend night clubs, those  
241 students who attend night clubs are more than double as prone to practice risky sexual behavior.  
242 This finding is supported by a previous study in Ethiopia (30). This can be explained by the fact

243 that students who attend night clubs frequently may have alcohol or smoking addiction, which  
244 can lead them to lose control over their sexual behaviors that could lead to risky sexual behavior.  
245 In harmony with prior studies in Nigeria (31) and in Ethiopia (32), this study discovered that a  
246 higher frequency of alcohol consumption increases the chance of having RSB. This could be  
247 related to the fact that consuming alcohol and drugs would increase risk-taking behavior, impair  
248 one's judgment on the risk of unprotected sexual behaviors and impair sexual health decision-  
249 making. Furthermore, drinking alcohol prior to sexual intercourse was believed to provide a  
250 socially acceptable excuse for nonuse of condoms.

251 Consistent with a study carried out in Aksum town (19), this study showed that parental neglect  
252 increases the chance of experiencing risky sexual behavior among secondary students. Perhaps  
253 this is due to a lack of parental monitoring and discussion with parents on sexual matters that  
254 will lead to the practice of risky sexual behavior due to being free from parental supervision and  
255 poor decision making on sexual and reproductive matters, as revealed in various studies (27, 29,  
256 33).

257 Having good HIV/AIDS-related knowledge among secondary students was associated with a  
258 lower risky sexual behavior experience in the current study area. This association is in agreement  
259 with a study performed in Arsi Negele (17). This could be attributed to students who have  
260 knowledge of the transmission of HIV/AIDS through unprotected sexual intercourse and having  
261 multiple sexual partners refraining from participating in such risky sexual behaviors.

262 Due to the employment of a cross-sectional study design, this study suffers from the chicken or  
263 egg dilemma regarding the temporal relation between the outcome variable and independent  
264 variables. This study also has a limitation of not including all youths in the study area.

## 265 **Conclusions**



266 One-fourth of the participants in this study engaged in risky sexual behavior, and frequent  
267 alcohol consumption, parental neglect, having sexually active close friends, poor knowledge of  
268 HIV/AIDS, and nightclub attendance were factors that were significantly positively associated  
269 with risky sexual behavior.

270 The results of this study highlight the importance of life skill training to tackle peer pressure,  
271 working to ease alcohol consumption and night club attendance to reduce the practice of risky  
272 sexual behavior among secondary school students in the South Omo Zone. Due emphasis should  
273 also be given to integrating adolescent health into health care service delivery by health  
274 extension workers and health workers while strengthening sexual and reproductive health  
275 services to youths and adolescents to enhance HIV/AIDS-related knowledge and informed  
276 decision making. Parents must be well informed about the developmental requirements of their  
277 teenager and promote open communication regarding sexual and reproductive health within the  
278 family. Finally, more studies should be conducted considering all youths and using prospective  
279 cohort or experimental study designs to explore the temporal relationship between various  
280 factors and RSB.

## 281 **List of abbreviations**

282 AIDS: Acquired Immunodeficiency Disease; AOR: Adjusted Odds Ratio; CI: Confidence  
283 Interval; HIV: Human Immunodeficiency Virus; RSB: Risky Sexual Behavior; SNNPR:  
284 Southern Nations, Nationalities and People's Region

## 285 **Declarations**

## 286 **Acknowledgments**

287 The authors are grateful to Jinka University for financial support and ethical clearance to conduct  
288 this work. Our acknowledgment also goes to thank the South Omo zonal health department for  
289 giving us permission to carry out the research and providing some relevant information. We  
290 extend our heartfelt appreciation to the data collectors, the supervisors and study participants  
291 without whom this work had been accomplished.

## 292 **Funding**

293 Jinka University sponsored this study through grant reference number JKU/RCE/13091. The  
294 funder has no specific role in the conceptualization, design, data collection, analysis, decision to  
295 publish, or preparation of the manuscript, which should be declared.

## 296 **Availability of data and materials**

297 The datasets used and/or analyzed during the current study are available from the corresponding  
298 author on reasonable request.

## 299 **Authors' contributions**

300 GAT wrote the study proposal, including its methods and work plan, in addition to analyzing the  
301 data and writing the results. GAT, EWW, MDA and BAA supervised the data collection and  
302 wrote the discussion and conclusion. All authors read and approved the final manuscript.

## 303 **Ethics approval and consent to participate**

304 Ethical Review Committee of Jinka University gave ethical clearance for this study (reference  
305 number: JKU/RCE/ERC/041/15). Confidentiality was guaranteed by excluding personal  
306 identifiers, and informed consent was obtained from the respondents. Respondents were allowed  
307 to not participate in the study or withdraw at any time during the study, upon their request.

308 **Consent for publication**

309 Not applicable.

310 **Competing interests**

311 The authors declare that they have no competing interests.

312 **References**

313 1. WHO, UNICEF, UNFPA. Investing in our future : a framework for accelerating action  
314 for the sexual and reproductive health of the young people. Geneva: World Health Organization;  
315 2006.

316 2. WHO. WHO recommendations on adolescent sexual and reproductive health and rights.  
317 Geneva: World Health Organization; 2018.

318 3. Dimbuene ZT, Emina JBO, Sankoh O. UNAIDS ‘multiple sexual partners’ core  
319 indicator: promoting sexual networks to reduce potential biases. Global Health Action.  
320 2014;7:23103.

321 4. Pandor A, Kaltenthaler E, Higgins A, Lorimer K, Smith S, Wylie K, et al. Sexual health  
322 risk reduction interventions for people with severe mental illness: a systematic review. BMC  
323 Public Health. 2015;15(138).

324 5. WHO. The health of young people: A challenge and a promise. Geneva: World Health  
325 Organization; 1993.

326 6. Underwood JM, Brener N, Thornton J, Harris WA, Bryan LN, Shanklin SL, et al.  
327 Overview and Methods for the Youth Risk Behavior Surveillance System — United States,  
328 2019. MMWR. 2020;69(1).

- 329 7. Hall PA, Holmqvist M, Sherry SB. Risky Adolescent Sexual Behavior: A Psychological  
330 Perspective for Primary Care Clinicians. *Topics in Advanced Practice Nursing eJournal*.  
331 2004;4(1).
- 332 8. WHO. Global Health Sector Strategy on HIV, 2016–2021: Towards Ending AIDS.  
333 Geneva: World Health Organization; 2016.
- 334 9. UNAIDS. Global AIDS Update 2021. Geneva: UNAIDS; 2021.
- 335 10. HIV Prevention in Ethiopia National Road Map 2018 - 2020. Addis Ababa: Federal  
336 HIV/AIDS Prevention and Control Office; 2018.
- 337 11. National Adolescent and Youth Reproductive Health Strategy (2016-2020): Federal  
338 Democratic Republic of Ethiopia Ministry of Health; 2016.
- 339 12. CSA, ICF. Ethiopia Demographic and Health Survey 2016. Addis Ababa, Ethiopia and  
340 Maryland, USA: Central Statistical Agency (CSA) [Ethiopia] and ICF; 2016.
- 341 13. Nigussie T, Legese T, Abebe L, Getachew S, Alemayehu D. Magnitude of risky sexual  
342 behaviors, determinants, and consequences among high school and preparatory school students  
343 in Mizan Aman Town, Ethiopia. *Journal of Midwifery and Reproductive Health*.  
344 2020;8(1):2096-104.
- 345 14. Woldeamanue BT. Risky sexual behavior and associated factors among high school  
346 adolescents in North Shewa zone, Oromia Region, Ethiopia. *PAMJ - One Health*. 2020;2(18).
- 347 15. keto T, Tilahun A, Mamo A. Knowledge, attitude and practice towards risky sexual  
348 behaviors among secondary and preparatory students of Metu town, south western Ethiopia.  
349 *BMC Public Health*. 2020;20:1394.

- 350 16. Kasahun AW, Yitayal M, Girum T, Mohammed B. Risky Sexual Behavior and  
351 Associated Factors Among High School Students in Gondar City, Northwest Ethiopia.  
352 International Journal of Public Health Science. 2017;6(3):257-65.
- 353 17. Megersa ND, Teshome GS. Risky sexual behavior and associated factors among  
354 preparatory school students in Arsi Negelle Town Oromia, Ethiopia. International Journal of  
355 Public Health Science. 2020;9(3):162-8.
- 356 18. Dekeke GD, Sandy PT. Factors influencing Sexual Risk Behaviors among Senior  
357 Secondary School Students (Youths). International Journal of Scientific and Research  
358 Publications. 2014;4(8).
- 359 19. Wikipedia. South Omo Zone: Wikipedia; 2022 [updated January 5, 2022. Available from:  
360 [https://en.wikipedia.org/wiki/South\\_Omo\\_Zone](https://en.wikipedia.org/wiki/South_Omo_Zone).
- 361 20. Girmay A, Mariye T. Risky sexual behavior practice and associated factors among  
362 secondary and preparatory school students of Aksum town, northern Ethiopia, 2018. BMC Res  
363 Notes. 2019;12:698.
- 364 21. Murphya A, Steeleb M, Dubec SR, Bateb J, Bonuckd K, Meissnere P, et al. Adverse  
365 Childhood Experiences (ACEs) Questionnaire and Adult Attachment Interview (AAI):  
366 Implications for parent child relationships. Child Abuse & Neglect. 2014;38(2):224-33.
- 367 22. Kocalevent R-D, Berg L, Beutel ME, Hinz A, Zenger M, Härter M, et al. Social support  
368 in the general population standardization of the Oslo social support scale (OSSS-3). BMC  
369 Psychology. 2018;6:31.
- 370 23. CDC. 2021 Standard High School YRBS: Centers for Disease Control and Prevention;  
371 2021. Available from: [http://www.cdc.gov/healthyyouth/data/yrbs/pdf/2021/2021-YRBS-](http://www.cdc.gov/healthyyouth/data/yrbs/pdf/2021/2021-YRBS-Standard-HS-Questionnaire.pdf)  
372 [Standard-HS-Questionnaire.pdf](http://www.cdc.gov/healthyyouth/data/yrbs/pdf/2021/2021-YRBS-Standard-HS-Questionnaire.pdf).

- 373 24. Srahbzu M, Tirfeneh E. Risky Sexual Behavior and Associated Factors among  
374 Adolescents Aged 15-19 Years at Governmental High Schools in Aksum Town, Tigray,  
375 Ethiopia. *BioMed Research International*. 2020;2020.
- 376 25. Kassa GM, Degu G, Yitayew M, Misganaw W, Muche M, Demelash T, et al. Risky  
377 Sexual Behaviors and Associated Factors among Jiga High School and Preparatory School  
378 Students, Amhara Region, Ethiopia. *International Scholarly Research Notices*. 2016;2016.
- 379 26. Gizaw A, Jara D, Ketema K. Risky Sexual Practice and Associated Factors among High  
380 School Adolescent in Addis Ababa, Ethiopia, 2014. *Fam Med Med Sci Res*. 2014;3(4):141.
- 381 27. Ndagijimana E, Biracyaza E, Nzayirambaho M. Risky sexual behaviors and their  
382 associated factors within high school students from Collège Saint André in Kigali, Rwanda: An  
383 institution-based cross-sectional study. *Front Reprod Health*. 2023;5.
- 384 28. Thepthien Bo, Celyn. Risky sexual behavior and associated factors among sexually-  
385 experienced adolescents in Bangkok, Thailand: findings from a school web-based survey.  
386 *Reproductive Health*. 2022;19:127.
- 387 29. Azeze GA, Gebeyehu NA, Wassie AY, Mokonnen TM. Factors associated with risky  
388 sexual behaviour among secondary and preparatory students in Wolaita Sodo town, Southern  
389 Ethiopia; Institution based cross-sectional study. *Afri Health Sci*. 2021;21(4):1830-41.
- 390 30. Aynalem BY, Alemu AA, Zeleke LB, Kassa GM. Risky sexual behavior and associated  
391 factors among secondary and above education level students in Ethiopia: A systematic review  
392 and meta-analysis. *J Family Med Prim Care*. 2022;11(9):5024-30.
- 393 31. Imaledo JA, Peter-Kio OB, Asuquo EO. Pattern of risky sexual behavior and associated  
394 factors among undergraduate students of the University of Port Harcourt, Rivers State, Nigeria.  
395 *Pan African Medical Journal*. 2012;9:97.

- 396 32. Fikre S, Tenkolu G, Mamo ZB. Risky Sexual Behavior and Associated Factors among  
397 Street Youth in Dilla Town, Gedeo Zone, South Ethiopia, 2018. *Ethiop J Health Sci.*  
398 2021;31(5):947.
- 399 33. Amoateng AY, Kalule-Sabiti I, Arkaah YJ. The Effect of Socio-Demographic Factors on  
400 Risky-Sexual Behaviours of Adolescents in the North West Province of South Africa. *African*  
401 *Population Studies.* 2014;28(1).
